# Supplementary material
Source: MDPI journal article supplement (https://www.mdpi.com/2073-4441/16/2/218)
Supplement: s1 [file s1]

# Photocatalytic degradation of sulfamethoxazole and enrofloxacin in water using electrospun composite photocatalytic membrane

Xiaohu Lin <sup>1,2,3,\*</sup>, Haifeng Fang <sup>1,3</sup>, Libing Wang <sup>1,3</sup>, Danyan Sun <sup>2</sup>, Gang Zhao <sup>2,4</sup> and Jingcheng Xu <sup>2,\*</sup>

<sup>1</sup> PowerChina Huadong Engineering Corporation Limited, Hangzhou 311122, China;

<sup>2</sup> College of Environmental Science and Engineering, Tongji University, Shanghai 200092, China;

<sup>3</sup> Huadong Eco-environmental Engineering Research Institute of Zhejiang Province, Hangzhou 311122, China;

<sup>4</sup> Shanghai Urban Construction Design & Research Institute (Group) Co. Ltd., 3447 Dongfang Rd, Shanghai, China;

\* Correspondence: [tjhjxhlin@tongji.edu.cn](mailto:tjhjxhlin@tongji.edu.cn) (X.L.), [jcxutj@126.com](mailto:jcxutj@126.com) (J.X.); Tel.: +86-0571-56613288 (X.L.); +86 021-65982010 (J.X.)

**Table S1.** Chemical Abstracts Service (CAS) Numbers of the major chemicals.

| Chemical                                    | CAS Number |
|---------------------------------------------|------------|
| Sulfamethoxazole (SMX)                      | 723-46-6   |
| Enrofloxacin (ENR)                          | 93106-60-6 |
| Acetonitrile                                | 75-05-8    |
| Methanol                                    | 67-56-1    |
| Ethyl acetate                               | 141-78-6   |
| Polyacrylonitrile (PAN)                     | 5014-41-9  |
| N,N-dimethylformamide (DMF)                 | 68-12-2    |
| Graphene oxide (GO)                         | 7440-44-0  |
| 3-Methacryloxypropyltrimethoxysilane (MEMO) | 2530-85-0  |

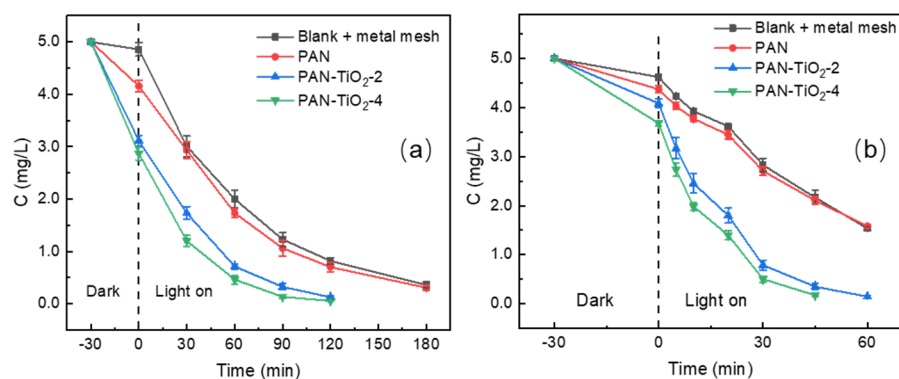**Figure S1.** Adsorption and photocatalytic degradation of (a) SMX and (b) ENR with PAN-TiO<sub>2</sub> composite membrane with the initial concentration of 5 mg/L and uncontrolled pH at room temperature (20°C).
